# Supplementary material for: Effect of straw retention and mineral fertilization on P speciation and P-transformation microorganisms in water- extractable colloids of a Vertisol
Source: Copernicus journal article supplement (doi:10.5194/bg-22-135-2025), 2025-01-10
Supplement: Supplementary file 1 [file bg-22-135-2025-supplement.pdf]

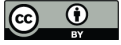

*Supplement of*

## **Effect of straw retention and mineral fertilization on P speciation and P-transformation microorganisms in water-extractable colloids of a Vertisol**

**Shanshan Bai et al.**

*Correspondence to:* Xiaoqian Jiang ([jiangxq7@mail.sysu.edu.cn](mailto:jiangxq7@mail.sysu.edu.cn))

The copyright of individual parts of the supplement might differ from the article licence.

Table S1 Chemical shift of peaks detected in  $^{31}\text{P}$ -NMR spectra of NaOH- $\text{Na}_2\text{EDTA}$  samples

| Category <sup>a</sup>     | P form or compound class      | Chemical Shift (ppm)                       |
|---------------------------|-------------------------------|--------------------------------------------|
| Inorganic P               |                               |                                            |
|                           | Orthophosphate                | 6.0                                        |
|                           | Pyrophosphate                 | -4.39±0.03                                 |
| Organic P                 |                               |                                            |
| Orthophosphate Monoesters |                               |                                            |
|                           | myo-IHP                       | 4.28±0.01, 4.44±0.02, 4.81±0.01, 5.71±0.02 |
|                           | scyllo-IHP                    | 3.96±0.02                                  |
|                           | $\alpha$ -glyc                | 5.01±0.02                                  |
|                           | $\beta$ -glyc                 | 4.66±0.02                                  |
|                           | Orthophosphate diesters-- DNA | -0.41±0.04                                 |

<sup>a</sup>myo-inositol hexakisphosphate (myo-IHP), scyllo-inositol hexakisphosphate (scyllo-IHP),  $\alpha$ -glycerophosphate ( $\alpha$ -glyc),  $\beta$ -glycerophosphate ( $\beta$ -glyc).

Table S2 The KO number, function descriptions, gene name and classification of the investigated genes referring to KEGG database

| Classification                                     | KO number | Details for gene function                                                         | Corresponding gene |
|----------------------------------------------------|-----------|-----------------------------------------------------------------------------------|--------------------|
| Genes involved in inorganic P-solubilization       | K00117    | quinoprotein glucose dehydrogenase                                                | <i>gcd</i>         |
|                                                    | K01507    | inorganic pyrophosphatase                                                         | <i>ppa</i>         |
|                                                    | K00937    | Polyphosphate kinase                                                              | <i>ppk</i>         |
|                                                    | K01524    | exopolyphosphatase / guanosine-5'-triphosphate,3'-diphosphate pyrophosphatase     | <i>ppx</i>         |
| Genes involved in organic P-mineralization         | K05774    | C-P lyase subunit, ribose 1,5-bisphosphokinase                                    | <i>phnN</i>        |
|                                                    | K00111    | Glycerol-3-phosphate dehydrogenase                                                | <i>glpA</i>        |
|                                                    | K00112    | Glycerol-3-phosphate dehydrogenase subunit B                                      | <i>glpB</i>        |
|                                                    | K00113    | Glycerol-3-phosphate dehydrogenase subunit C                                      | <i>glpC</i>        |
|                                                    | K00864    | Glycerol kinase glpK                                                              | <i>glpK</i>        |
|                                                    | K01083    | 3-Phytase                                                                         | <i>phy</i>         |
|                                                    | K01093    | 4-phytase                                                                         | <i>appA</i>        |
|                                                    | K01126    | glycerophosphoryl diester phosphodiesterase                                       | <i>ugpQ</i>        |
|                                                    | K01077    | alkaline phosphatase                                                              | <i>phoA</i>        |
|                                                    | K01113    | alkaline phosphatase                                                              | <i>phoD</i>        |
|                                                    | K09474    | acid phosphatase (class A)                                                        | <i>phoN</i>        |
|                                                    | K03788    | acid phosphatase (class B)                                                        | <i>aphA</i>        |
| Genes involved in P-starvation response regulation | K07636    | two-component system, OmpR family, phosphate regulon sensor histidine kinase PhoR | <i>phoR</i>        |
|                                                    | K07657    | two-component system, OmpR family, phosphate regulon response regulator PhoB      | <i>phoB</i>        |
| Genes involved in P-uptake and transport system    | K05813    | Glycerol-3-phosphate transporter subunit, periplasmic-binding component           | <i>ugpB</i>        |
|                                                    | K05814    | Glycerol-3-phosphate transporter subunit                                          | <i>ugpA</i>        |
|                                                    | K05815    | Glycerol-3-phosphate transporter subunit, membrane component                      | <i>ugpE</i>        |
|                                                    | K05816    | Glycerol-3-phosphate transporter subunit, ATP-binding component                   | <i>ugpC</i>        |
|                                                    | K02041    | phosphonate transport system, ATP-binding component                               | <i>phnC</i>        |
|                                                    | K02042    | phosphonate transport system, membrane component                                  | <i>phnE</i>        |
|                                                    | K02044    | phosphonate transport system, periplasmic-binding component                       | <i>phnD</i>        |
|                                                    | K02036    | phosphate transport system, ATP-binding component                                 | <i>pstB</i>        |
|                                                    | K02037    | phosphate transport system, membrane component                                    | <i>pstC</i>        |
|                                                    | K02038    | phosphate transport system, membrane component                                    | <i>pstA</i>        |
|                                                    | K02040    | phosphate transport system, periplasmic-binding component                         | <i>pstS</i>        |

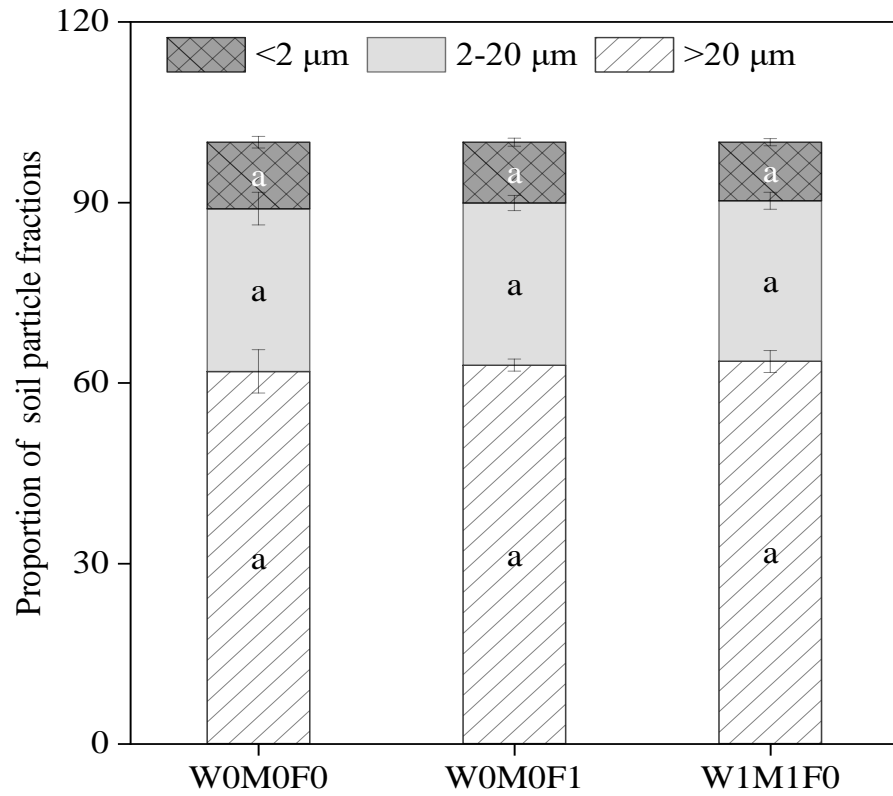

Fig. S1 Proportion of water-dispersible soil particle fractions for the WOM0F0, WOM0F1 and W1M1F0 treatments

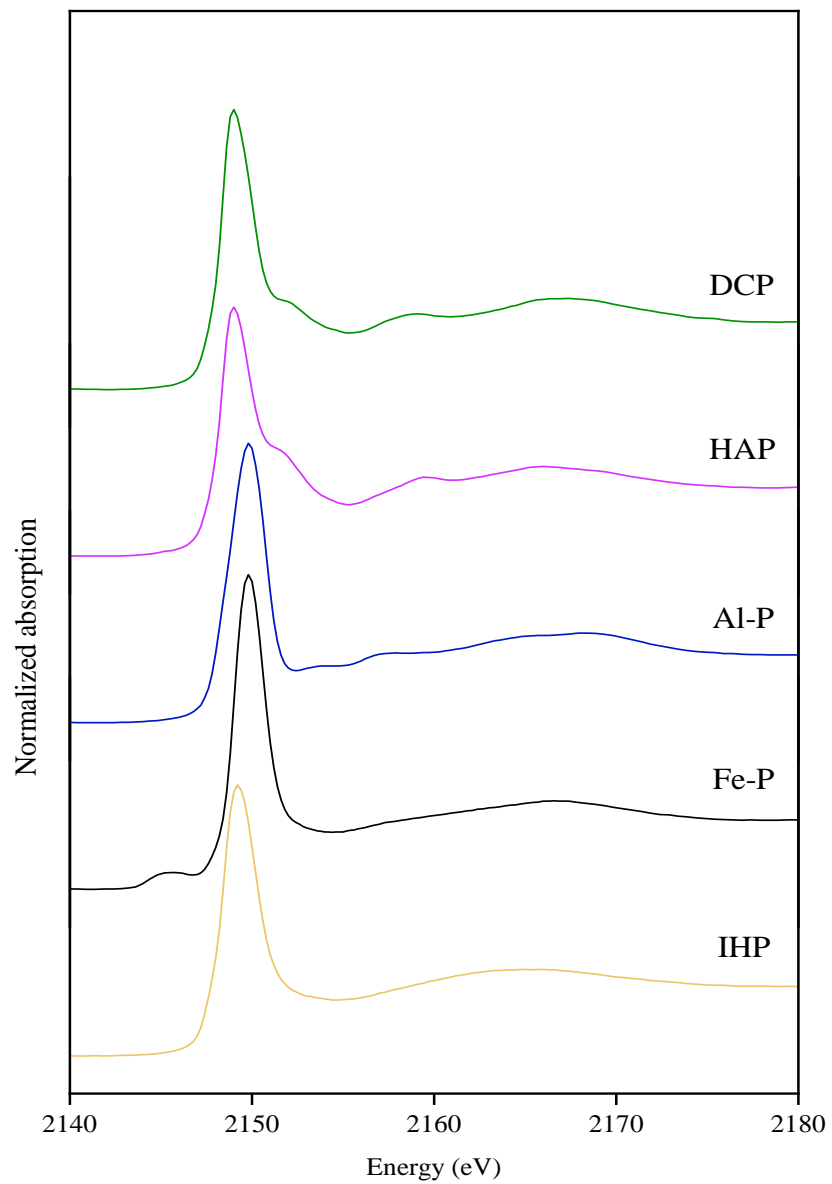

Figure S2 Phosphorus K-edge XANES spectra of P reference compounds

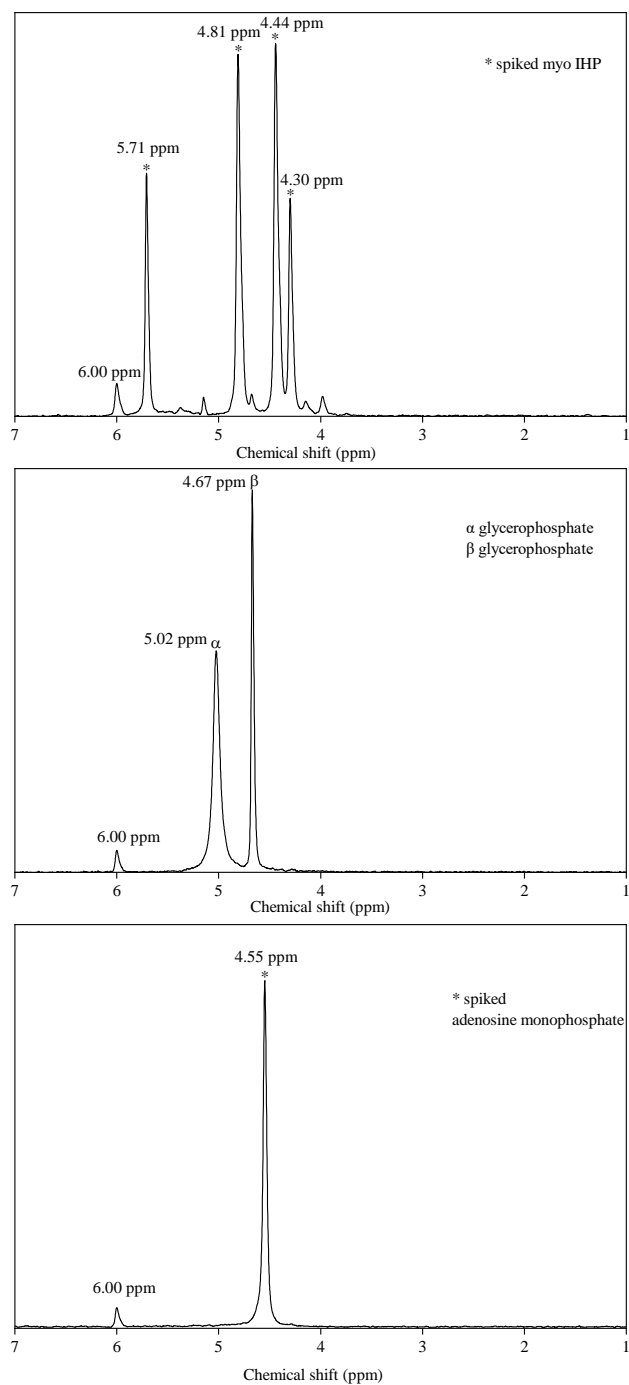

Fig. S3 The solution  $^{31}\text{P}$  NMR spectrum of a NaOH- $\text{Na}_2\text{EDTA}$  extract of the W0M0F0 bulk soil spiked with a) myo-inositol hexakisphosphate (Myo-IHP), b)  $\alpha$ - glycerophosphate and  $\beta$ - glycerophosphate, and c) adenosine monophosphate.

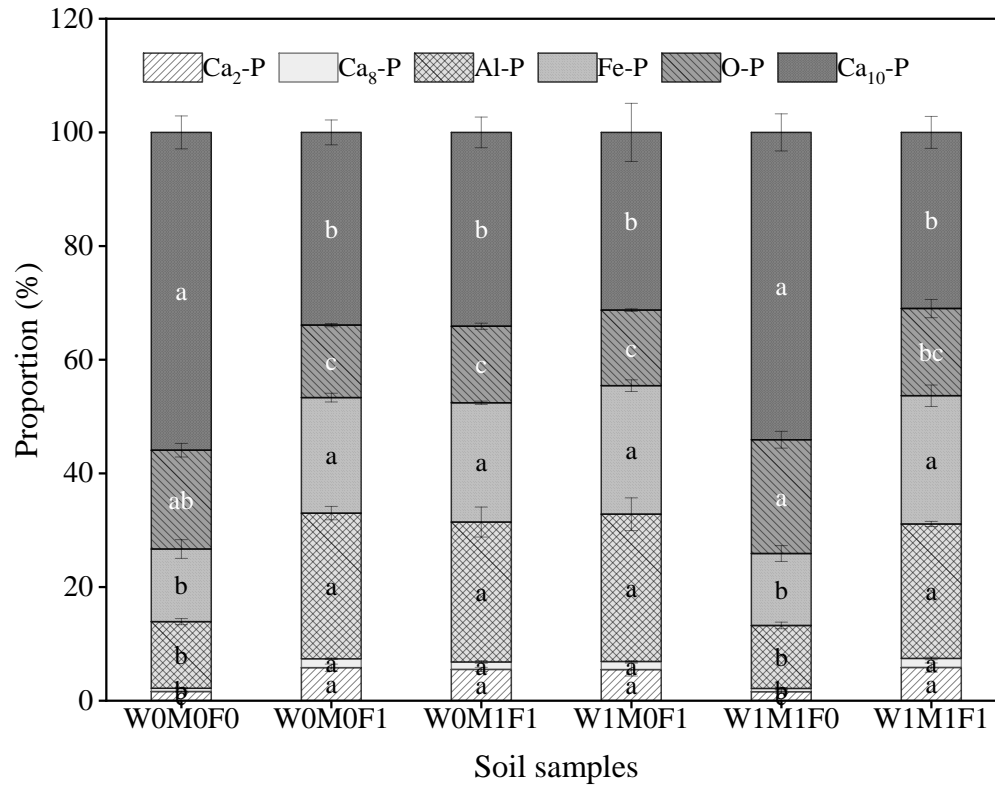

Fig. S4 Proportion of different soil inorganic phosphorus fractions in bulk soil

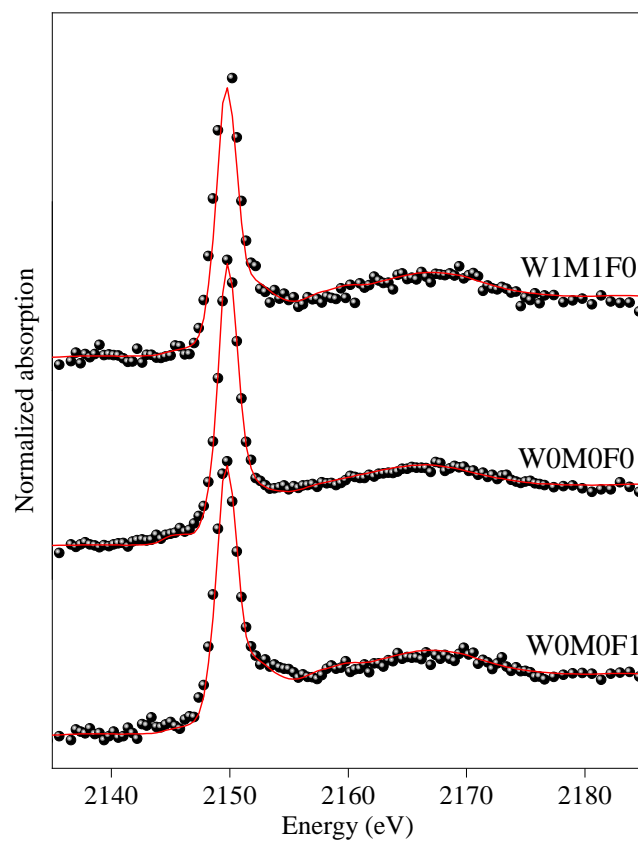

Fig. S5 Results of the linear combination fitting (LCF) of the P K- edge XANES spectra for water-extractable colloids (WECs) of the W0M0F0, W0M0F1 and W1M1F0 treatments. The raw data is represented by points and the fitting results are shown by solid lines.



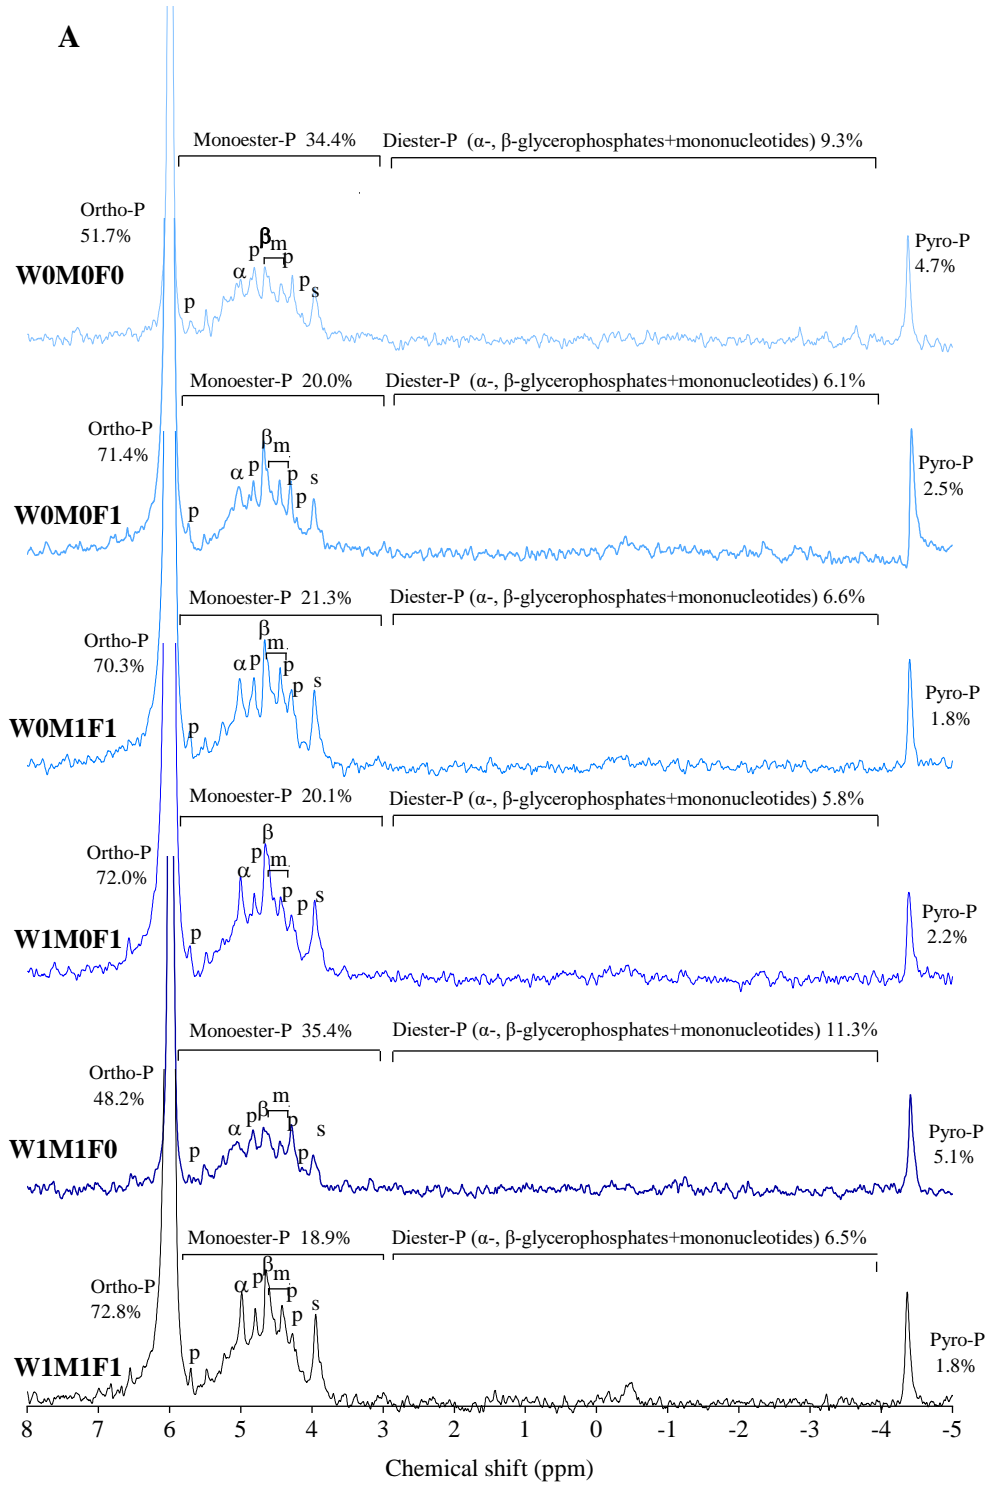

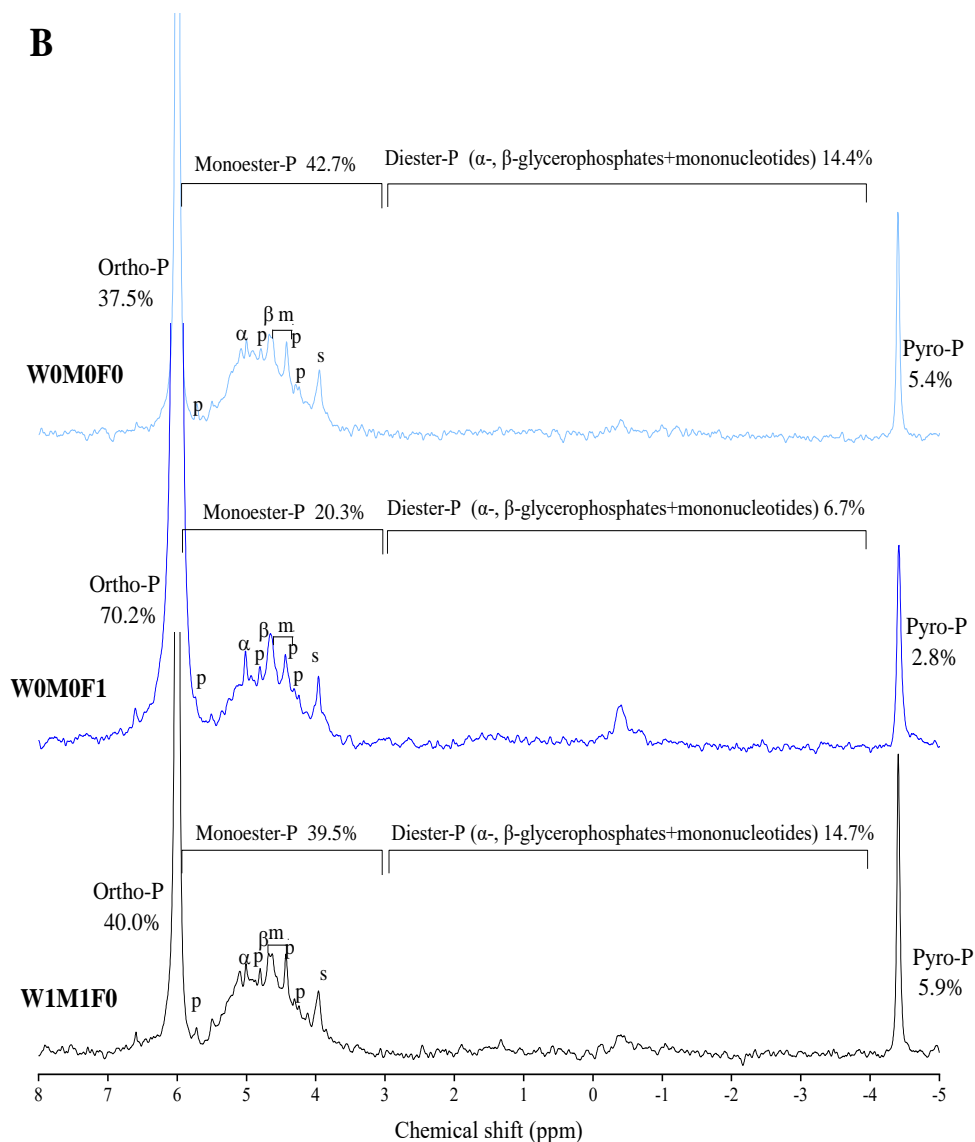

Fig. S6 Solution  $^{31}\text{P}$  NMR spectra of NaOH–Na<sub>2</sub>EDTA extracts of bulk soil (A) and water-extractable colloids (WECs, B). The signals were assigned as follows: orthophosphate (Ortho-P); orthophosphate monoester (Monoester-P); orthophosphate diesters (Diester-P); pyrophosphate (Pyro-P); myo-inositol hexakisphosphate (p); sylo-inositol hexakisphosphate (s); mononucleotides (m);  $\alpha$ -glycerophosphate ( $\alpha$ );  $\beta$ -glycerophosphate ( $\beta$ ). Calculation by including diester degradation products (i.e., Glyc+nucl:  $\alpha/\beta$ - glycerophosphate and mononucleotides) with Diesters-P rather than Monoesters-P. The percentage indicated the proportion of each phosphorus compounds fraction to the extracted-P.

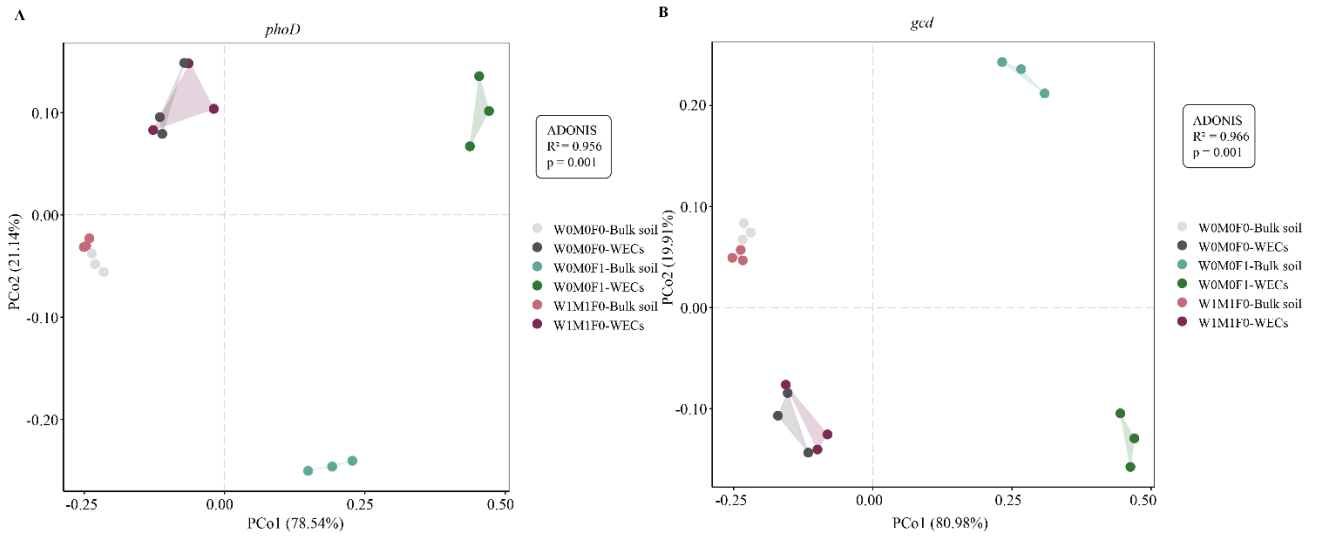

Fig. S7 Principal coordinate analysis (PCoA) of microbial community for *phoD* (A) and *gcd* (B) gene in bulk soils and water-extractable colloids (WECs)

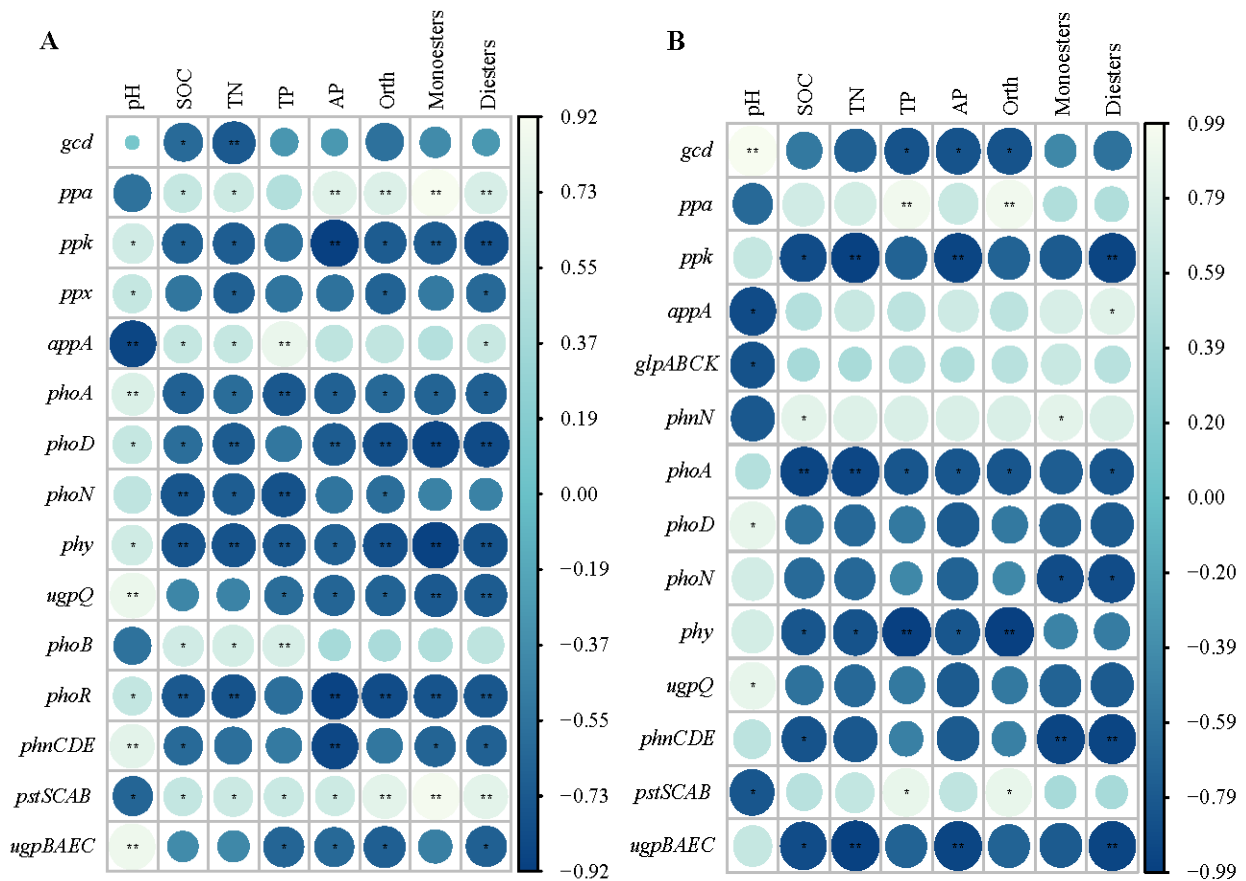

Fig. S8 Spearman correlation heatmap of P-cycling genes and soil nutrients in bulk soils (A) and water-extractable colloids (WECs, B)

The relative abundance of *phn* transporter systems was calculated as the average abundances of gene *phnC*, *phnD*, and *phnE*; the *pst* transporter systems was calculated as the average abundances of gene *pstS*, *pstC*, *pstA*, and *pstB*; The *ugp* transporter systems was calculated as the average abundances of gene *ugpB*, *ugpA*, *ugpE*, and *ugpC*. Soil properties include soil pH, soil organic carbon (SOC), total nitrogen (TN), total phosphorus (TP), available P (AP), orthophosphate (Orth), orthophosphate monoesters (Monoesters), orthophosphate diesters (Diesters). Asterisks indicate a significant association between the abundance of a given functional gene and particular soil properties: \*\*,  $p < 0.01$ ; \*,  $p < 0.05$ .
